# Supplementary material
Source: publisher site journal article supplement (https://www.dovepress.com/article/277647)
Supplement: Supplementary file 1 [file get_supplementary_file.php]

**Supplementary materials**

**TITLE:**

**Creativity in narcolepsy type 1: the role of dissociated REM sleep manifestations**

Anita D’Anselmo1,2, Sergio Agnoli2,3, Marco Filardi1, Fabio Pizza1,4, Serena Mastria2,3, Giovanni Emanuele Corazza2,3,6, Giuseppe Plazzi4,5*.

1Department of Biomedical and Neuromotor Sciences (DIBINEM), University of Bologna, Bologna, Italy

2Marconi Institute for Creativity (MIC), Villa Griffone, Sasso Marconi, Bologna, Italy

3Department of Electrical, Electronic, and Information Engineering “Guglielmo Marconi”, University of Bologna, Bologna, Italy

4IRCCS Istituto delle Scienze Neurologiche di Bologna, Bologna, Italy.

5Department of Biomedical, Metabolic and Neural Sciences, University of Modena and ReggioEmilia, Modena, Italy

6Université de Paris and Univ Gustave Eiffel, LaPEA, Boulogne-Billancourt, France

* Correspondingauthor:

Prof. Giuseppe Plazzi

IRCCS, Istituto delle Scienze Neurologiche di Bologna,

Via Altura n°3, 40139 Bologna, Italy.

Phone: +39 051 4966929. Fax: +39 051 4966176.

Email: giuseppe.plazzi@unibo.it

**Supplementary methods**

**CAAC: Creative Activity and Accomplishment Checklist**

Patients are required to report how frequently they performed artistic, technological, and everyday creative activities within the working environment and outside of work.

An example item for technological creative achievement was: “How many times have you used Google to solve a problem?”; an example item for the artistic creative achievement was: “How many times have you written a poem for someone or for a particular occasion?”; an example item for the everyday creative achievement was: “How many times have you cooked an original dish?”. For each item, participants had to check two responses that best described the frequency of the activity performed, respectively, inside the working environment and outside of work. The creative achievement total score has been obtained from the average of the three specific scores.

**AUT: Alternative Uses Task**

Six common objects were presented (barrel, book, chair, hanger, light bulb, plastic bottle). Each stimulus was displayed for three minutes on the pc monitor. Patients are required to generate and type as many uncommon or original uses for each one as they can think of.

Participants in the AUT generated 1473 responses. Each response was evaluated for the originality by two independent expert raters. All the responses were copied into a spreadsheet and sorted alphabetically within each object. This method ensured that the raters were blind to several factors that could bias their ratings: the response serial position in the set, the total number of responses in the set, and the preceding and following responses. The raters read all the responses prior to scoring them, and they scored the responses separately.

Performance has been evaluated in terms of ideational fluency and originality that is respectively the quantity and quality of generated ideas.

**SSCS: Short Scale of the Creative Self**

The scale provides indicators of creative self-efficacy (CSE) and creative personal identity (CPI). These two constructs are evaluated by 11 items, 6 of which measure CSE (an example item is “I know I can efficiently solve even complicated problems”) and 5 of which measure CPI (an example item is “I think I am a creative person”). All items are rated using a 5-point Likert scale ranging from 1 “definitely not” to 5 “definitely yes”.

**MW: Mind wandering deliberate (MW–D) and mind wandering spontaneous (MW–S)**

MW-D consists of 4 items (an example item is “I allow my thoughts to wander on purpose”) scored with a 7-point Likert scale ranging from 1 “rarely” to 7 “almost always” for Items 1, 2, and 4, and ranging from 1 “not at all true” to 7 “very true” for Item 3.

MW-S consists of 4 items (an example item is “It feels like I don't have control over when my mind wanders”) scored with a 7-point Likert scale ranging from 1 “rarely” to 7 “a lot” for Items 1, 2, and 4, and ranging from 1 “almost never” to 7 “almost always” for Item 3.

Participants were asked to select the answer that most accurately reflects their everyday MW.

**DDFS: Daydreaming Frequency Scale**

The DDFS consists of 12 items. Participants rated self-report measure of daydreaming experiences in their daily life, using a 5-point Likert scale (an example item is “I daydream” 1. infrequently. 2. once a week. 3. once a day. 4. a few times during the day. 5. many different times during the day).

**Supplementary table**

**Table S1** - Comparisons of the scores on the questionnaires and test of creativity in narcoleptic patients treated with sodium oxybate vs. patients untreated with sodium oxybate.

|  | **Patients treated with sodium oxybate** | **Patients untreated with sodium oxybate** | **p** |
| --- | --- | --- | --- |
|  | N = 43 | N = 23 |  |
|  |  |  |  |
| CAAC | 1.59 ± 0.35 | 1.56 ± 0.31 | 0.76 |
| Fluency | 25.47 ± 13.06 | 27.59 ± 10.98 | 0.53 |
| Originality | 2.24 ± .34 | 2.32 ± 0.27 | 0.37 |
| CSE | 20.88 ± 4.78 | 22.30 ± 4.33 | 0.28 |
| CPI | 17.14 ± 4.68 | 18.39 ± 4.69 | 0.31 |
| MW-S | 2.94 ± 1.69 | 3.5 ± 1.56 | 0.20 |
| MW-D | 3.48 ± 1.77 | 3.61 ± 1.68 | 0.79 |
| SP-H | 2.84 ± 3.53 | 4.48 ± 3.73 | 0.08 |
| EDS-NS | 11.02 ± 5.78 | 15.22 ± 5.86 | 0.01 |
| CATA | 4.47 ± 3.60 | 7.17 ± 4.03 | 0.01 |
| NSS | 18.33 ± 9.47 | 26.87 ± 9.64 | 0.00 |
| DDFS | 14.93 ± 9.91 | 16.91 ± 13.43 | 0.50 |
| ESS | 9.23 ± 4.07 | 13.27 ± 4.56 | 0.01 |
